# Supplementary material
Source: MDPI journal article supplement (https://www.mdpi.com/2073-4352/9/3/134)
Supplement: s1 [file s1]

Supporting Information

**Optimally Sr–doped free TiO2@SrTiO3 heterostructured nanowire arrays for high-efficiency self-powered photoelectrochemical UV photodetector Applications**

Shiming Ni1, Fengyun Guo1*, Dongbo Wang1*, Shujie Jiao1, Jinzhong Wang1, Yong Zhang1, Bao Wang1, and Liancheng Zhao1

1Department of Optoelectronic Information Science, School of Materials Science and Engineering, Harbin Institute of Technology, Harbin 150001, China

**EXPERIMENTAL METHOD**

**Preparation of TiO2 nanowires (NWAs).**

TiO2 NWAs were prepared on FTO glass (15 Ω square) by a one-step solvothermal method. First, preparation a TiO2 seed layer on the clean FTO glass by an aqueous solution with 0.2 M of TiCl4. After maintaining at 70 °C for 30 min, the FTO glass was annealing at 550 °C for 60 min in air. Subsequently, the FTO glass with seed layer was put in a mixed solution with 3 mL of TiCl4, 30 mL of concentrated HCl (36~38 wt%), 10 ml DI water and 20 mL of ethanol in a 100 ml Teflon-lined stainless steel autoclave. Then keep the autoclave heated at 150 °C for 12 h in a constant temperature electric oven. After the autoclave naturally cooling down to ambient temperature, swilling out the obtained samples with DI water and absolute ethyl alcohol for three times is indispensable.

**Preparation of TiO2@SrTiO3 core-shell NWAs.**

The FTO glass with prepared TiO2 nanowire arrays were horizontally placed in the bottom of a 100 ml Teflon-lined stainless steel autoclave. The film was placed face up, into 80ml aqueous solution of 0.01 M Sr(NO3)2, and then NaOH was added to adjust the pH value of the solution to 14. Then keep the autoclave heated at 120 °C in a constant temperature electric oven. The nanowire arrays of TiO2@SrTiO3 were prepared by reaction for 20, 40, 60 and 120 minutes, respectively. After the autoclave naturally cooling down to ambient temperature, swilling out the obtained samples with DI water and absolute ethyl alcohol for three times is indispensable.

The prepared TiO2@SrTiO3 nanowire arrays were labeled as STO1, STO2, STO3 and STO4, respectively, and the pure nanowire arrays were labeled as STO0.

**Assembling of photoelectrochemical self-powered UVPDs.**

The as-prepared TiO2 NWAs and TiO2@SrTiO3 core-shell NWAs on FTO glass were prepared anodes for photoelectrochemical self-powered UVPDs similar to previous report.[39,40] Before assembling, an annealing process at 500 °C for 30 min in air is needed for all samples. The solvent of the electrolyte is the mixture of acetonitrile and n-Butyl cyanide (volume ratio:85/15). The concentration of 1,3-dimethylimidazolium, LiI, I2, TBP, and guanidinium thiocyanate in the electrolyte is 1.0 M, 0.5 mM, 30 mM, 0.5 M and 0.1 M, respectively. Pt counter electrode was prepared by doctor-blade method which thickness is about 5 μm. A 60 μm thick Bynel film (DuPont) was used as thermal adhesive films between the photoanodes and platinized counter electrodes. An electrolyte-infusing hole was prepared on the corner of counter electrode and the internal space was filled with a liquid electrolyte by a vacuum backfilling method. At last, the electrolyte-infusing hole was sealed hermetically by a cover glass and thermal adhesive films.

**Characterization.**

The morphology and crystallinity of the samples were characterized by field emission scanning electron microscopy (FESEM, JEOL JEM-6700F), high-resolution transmission electron microscopy (HRTEM, JEOL JEM-2100), and X-ray diffraction (XRD, Rigaku D/max-2500). X-ray photoelectron spectroscopy (XPS) measurement was done on the spectrometer (ESCALAB 250Xi, Thermo Scientific Escalab). The photocurrent density−voltage (*J*−*V*) characteristics of the UVPDs were tested with a Source Meter (Keithley Instruments). The spectral photoresponsivity were estimated using a 500-W xenon lamp (Zolix) with a monochromator operated in direct current (DC) mode. The UV-vis diffuse reflectance spectra was taken employing a PerkinElmer Lambda 850 UV−visible spectrophotometer. The electrochemical impedance spectroscopy (EIS) measurements for the UVPDs were conducted on the Metrohm electrochemical workstation (AutolabPGSTAT302N). The EIS measurements were conducted in the dark with a perturbation modulation of 20 mV from 10 mHz to100 kHz. PL characterizations were recorded in CCD spectroscopy at fixed excitation intensity by a He−Cd laser line of 325 nm at room temperature. The open-circuit voltage decay and photocurrent response were also conducted on the Metrohm electrochemical workstation (AutolabPGSTAT302N).


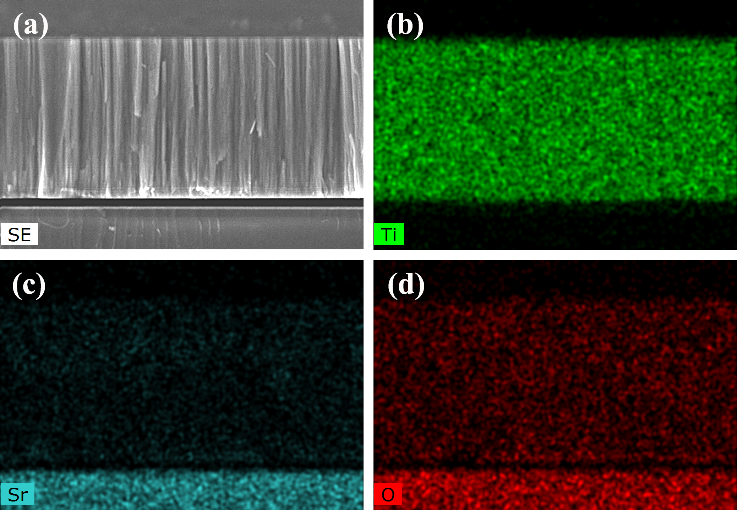


**Figure S1** EDS elemental mapping images of cross section of TiO2@SrTiO3 heterostructured nanowire arrays (STO3)


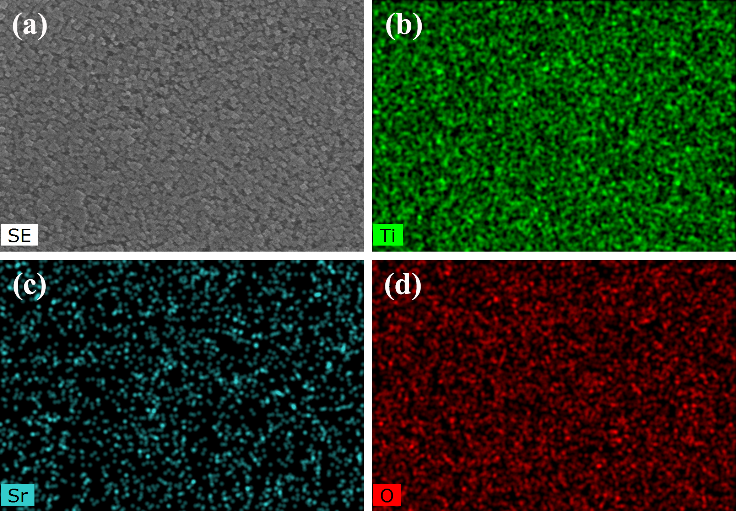


**Figure S2** EDS elemental mapping images of top surface of TiO2@SrTiO3 heterostructured nanowire arrays (STO3)


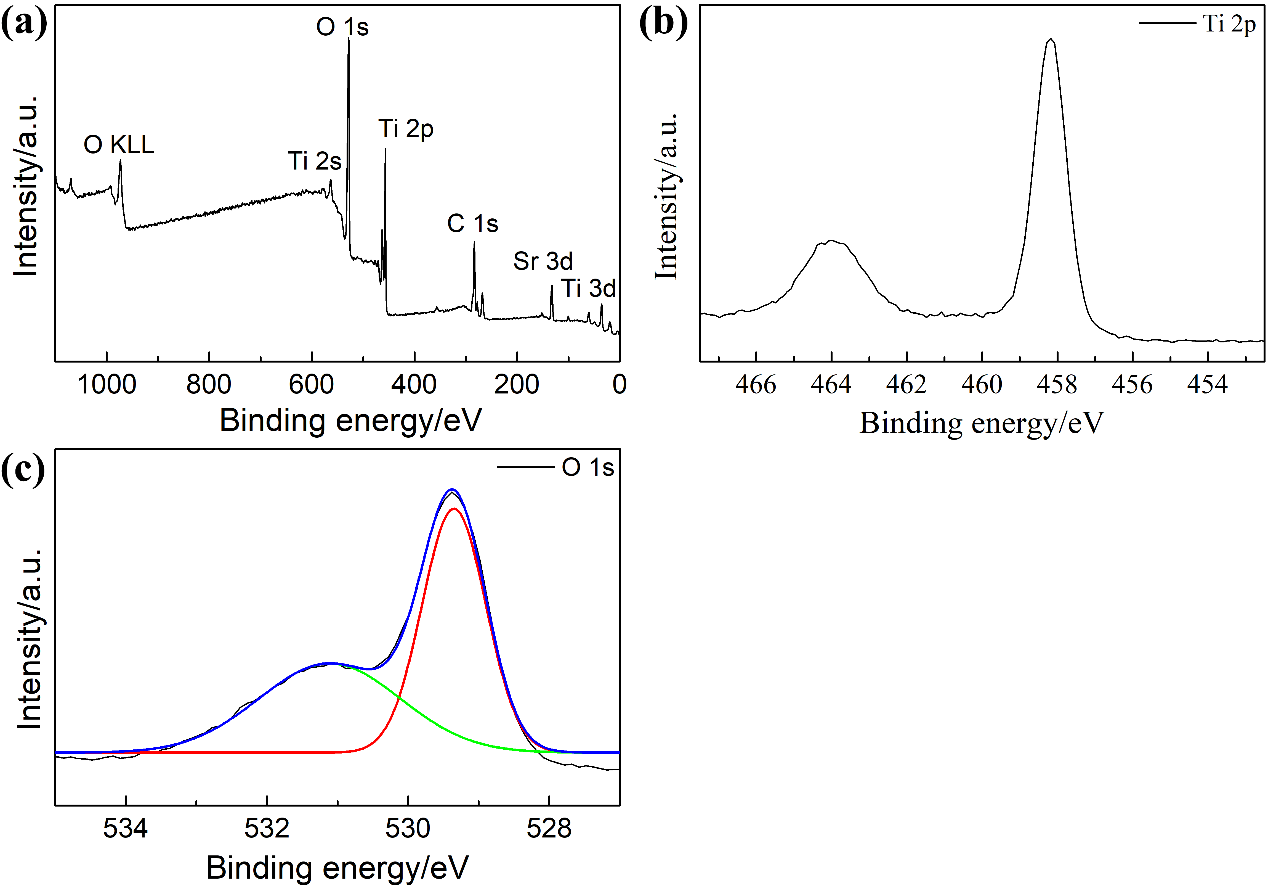


**Figure S3** (a) XPS of TiO2@SrTiO3 heterostructure nanowire arrays (STO2), (b) XPS spectra of Ti 2p, and (C) XPS spectra of O 1s.


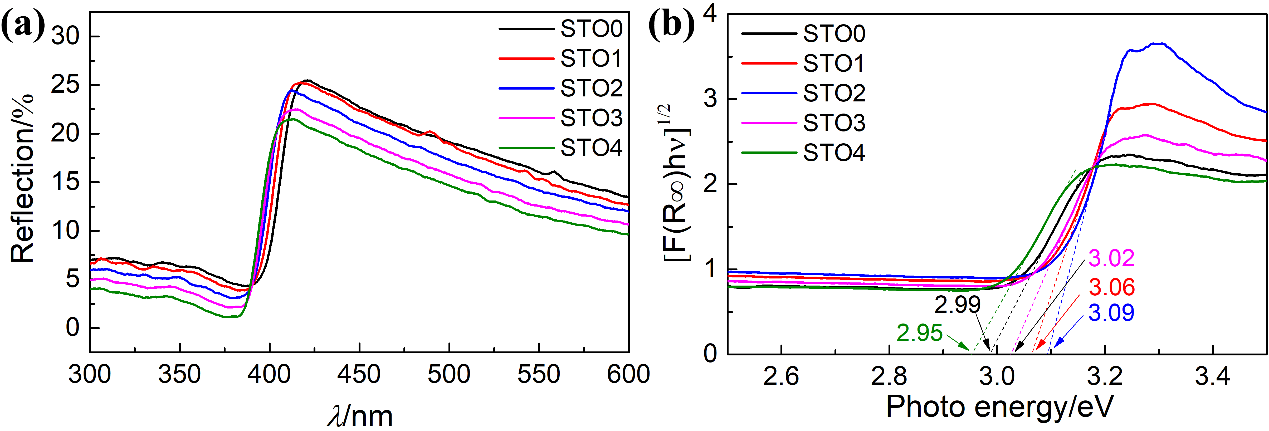


Figure S4 (a) The UV-vis diffusive reflectance spectra of samples STO0, STO1, STO2, STO3, STO4 and (b) the plots of transforming the Kubelka–Munk function versus the energy of light.

According to previous work[1], the Kubelka–Munk function is applied to convert the diffuse reflectance into the equivalent band gap energy:

F(*R*∞) = (1-*R*)2/(2*R*) (4)

here *R* is the reflectance of the sample.

Figure S4b shows the plot of [F(R∞)hν]1/2 vs. hν, in which linear segments are extended to intersect with the hn-axis to obtain the indirect band gap of the samples.

[1] H. A. Hamedani, N. K. Allam, H. Garmestani, M. A. El-Sayed, Electrochemical Fabrication of Strontium-Doped TiO2 Nanotube Array Electrodes and Investigation of Their Photoelectrochemical Properties, Journal of Physical Chemistry C 115 (2011) 13480–13486.


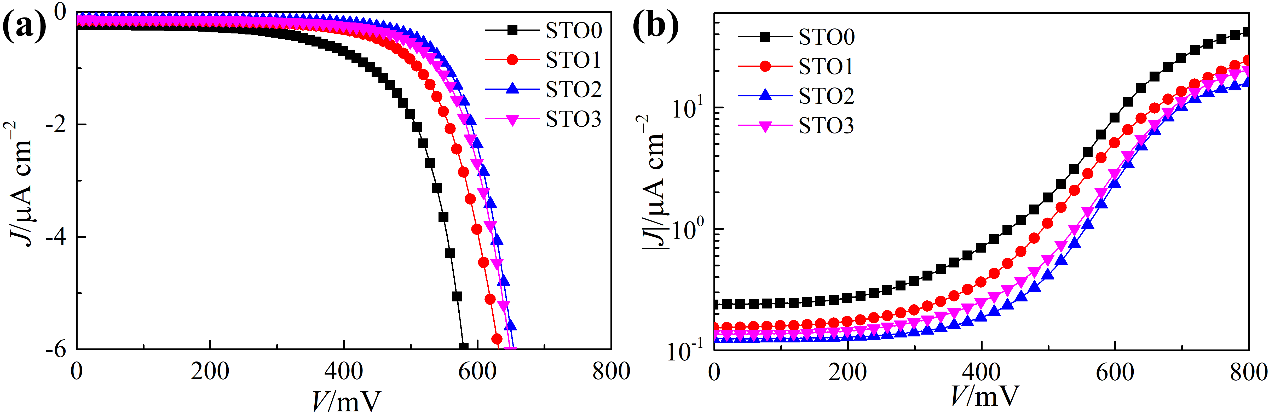


Figure S5 Dark current density–voltage of all UVPDs (a) normal, (b) semi-logarithmic plots.

**The calculation formula of the exciton electron lifetime (*τ*e)**





Figure S6 Open-circuit voltage decay for all UVPDs and the UV intensity at first 10 seconds is 10 mA cm-2.

The exciton electron lifetime (*τ*e) can be calculated from the corresponding OCVD curve of the UVPDs and by the following equation:

where kBT is the thermal energy and e is the positive elementary charge.

Reference:

1. Zaban, A.; Greenshtein, M.; Bisquert, J. Determination of the electron lifetime in nanocrystalline dye solar cells by open-circuit voltage decay measurements. ChemPhysChem 2003, 4 (8), 859.

2. Lee, B.; Kim, J.; Lee, S.; Hwang, T.; Nam, S.; Choi, H.; Kim, K.; Kim, J.; Park, B. Oriented hierarchical porous TiO2 nanowires on Ti substrate: evolution of nanostructures for dye-sensitized solar cells. Electrochim. Acta 2014, 145, 231.

3. Liu, Y.; Zhang, M.; Jiang, Y.; Xia, Y.; Sun, W.; Zhao, X. General strategy to construct hierarchical TiO2 nanorod arrays coupling with plasmonic resonance for dye-sensitized solar cells. Electrochim. Acta 2015, 173, 483.


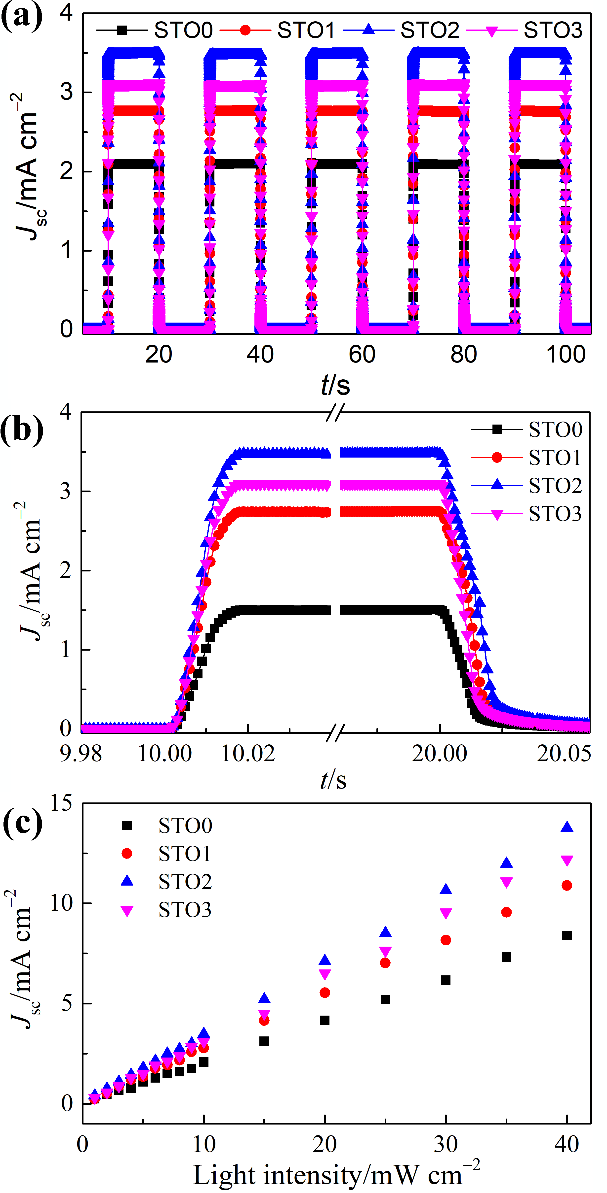


**Figure S7** (a) Photocurrent responses, (b) The enlarged rising and decaying edges of the photocurrent response, and (c) *J* as a function of the incident UV light intensity from 1 to 40 mW cm‒2 of UVPDs based on STO0, STO1, STO2, STO3


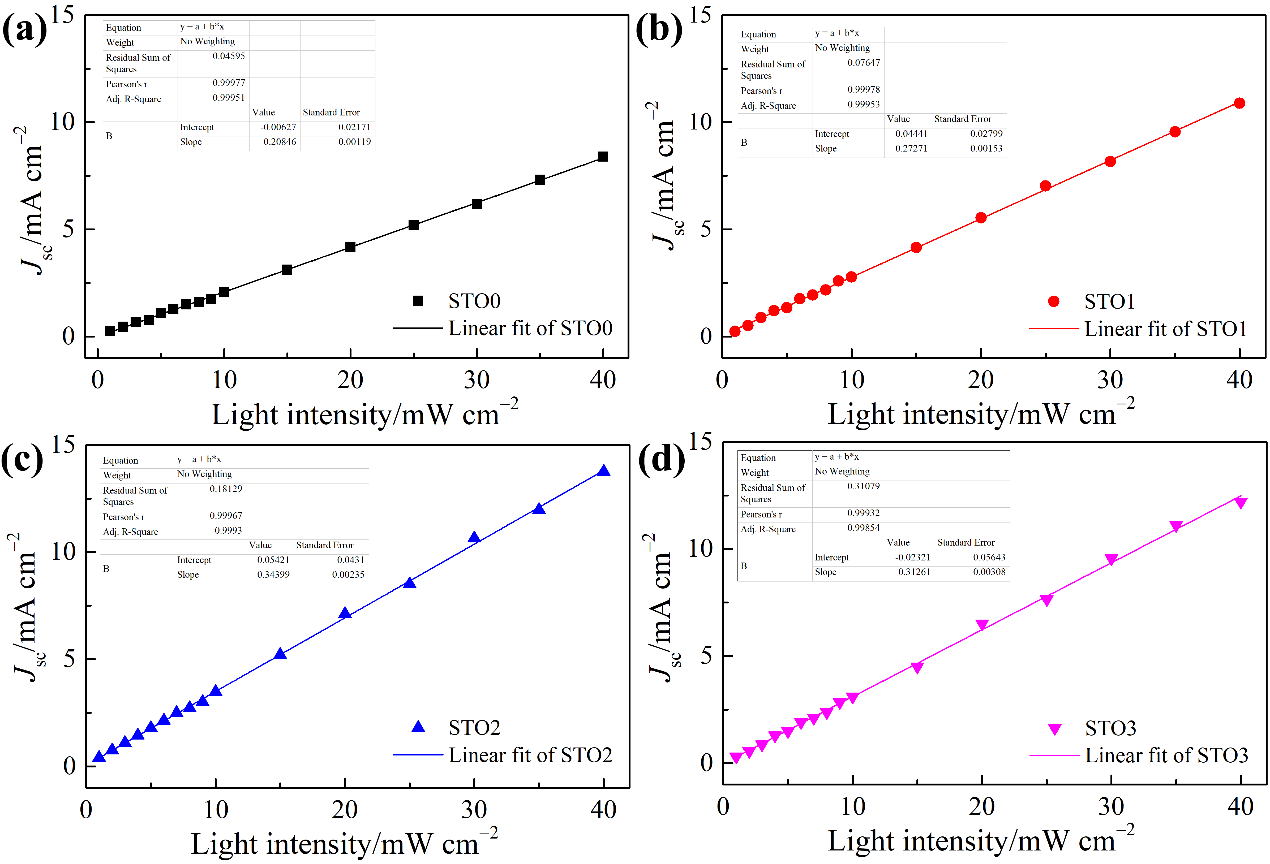


**Figure S8** Linear fitting of *J* as a function of the incident UV light intensity from 1 to 40 mW cm‒2 of UVPDs based on STO0, STO1, STO2, STO3.
